# Supplementary material for: Improved Fluorescent Proteins for Dual-Colour Post-Embedding CLEM
Source: MDPI journal article supplement (doi:10.3390/cells11071077), 2022-03-23
Supplement: s1 [file s1]

# Improved Fluorescent Proteins for Dual-Colour Post-Embedding CLEM

Dingming Peng <sup>1,2,†</sup>, Na Li <sup>1,3,4,5,†</sup>, Wenting He <sup>1</sup>, Kim Ryun Drasbek <sup>4,5</sup>, Tao Xu <sup>2,6,\*</sup>, Mingshu Zhang <sup>1,2,\*</sup> and Pingyong Xu <sup>1,2,6,7,\*</sup>

<sup>1</sup> Key Laboratory of RNA Biology, Institute of Biophysics, Chinese Academy of Sciences, Beijing, 100101, China; dmpeng7@gmail.com (D.P.); nali9415001@gmail.com (N.L.); hewenting@ibp.ac.cn (W.H.)

<sup>2</sup> Bioland Laboratory (Guangzhou Regenerative Medicine and Health Guangdong Laboratory), Guangzhou 510005, China

<sup>3</sup> Sino-Danish College, University of Chinese Academy of Sciences, Beijing, 100101, China

<sup>4</sup> Sino-Danish Center for Education and Research, Beijing, 100039, China; ryun@cfin.au.dk

<sup>5</sup> Center of Functionally Integrative Neuroscience, Department of Clinical Medicine, Aarhus University, Aarhus, 8000, Denmark

<sup>6</sup> National Laboratory of Biomacromolecules, CAS Center for Excellence in Biomacromolecules, Institute of Biophysics, Chinese Academy of Sciences, Beijing, 100101, China

<sup>7</sup> College of Life Sciences, University of Chinese Academy of Sciences, Beijing, 101408, China

\* Correspondence: xutao@ibp.ac.cn (T.X.); zhangmingshu@ibp.ac.cn (M.Z.); pyxu@ibp.ac.cn (P.X.)

† These authors contributed equally to this work.

|                  |                                                                                                                            |
|------------------|----------------------------------------------------------------------------------------------------------------------------|
| <b>Figure S1</b> | Autofluorescence of an Epon resin slice                                                                                    |
| <b>Figure S2</b> | Green fluorescence emission properties of RFPs                                                                             |
| <b>Figure S3</b> | Photoswitching properties of mEosEM and mutants before EM sample preparation                                               |
| <b>Figure S4</b> | Scheme of sLM imaging of an EM sample                                                                                      |
| <b>Figure S5</b> | SBR comparison of mEosEM and mEosEM-E in OFF- and ON-images                                                                |
| <b>Figure S6</b> | Pre-fixation influence on RFPs                                                                                             |
| <b>Figure S7</b> | Fluorescence intensity of RFPs in pre-fixed cells followed by dehydration                                                  |
| <b>Figure S8</b> | SBR comparison of RFPs after EM sample preparation                                                                         |
| <b>Figure S9</b> | Dual-color post-Epon-embedding CLEM imaging of Nopp52 and Nopp140                                                          |
| <b>Table S1</b>  | Statistics for contrast ratio of mEosEM and mutants before EM sample preparation                                           |
| <b>Table S2</b>  | Statistics for contrast ratio comparison between mEosEM and mEosEM-E                                                       |
| <b>Table S3</b>  | Statistics for SBR of mEosEM in OFF, ON, and ON — OFF images                                                               |
| <b>Table S4</b>  | Statistics for SBR of mEosEM-E in OFF, ON, and ON — OFF images                                                             |
| <b>Table S5</b>  | Statistics for SBR comparison between mEosEM and mEosEM-E in ON — OFF images                                               |
| <b>Table S6</b>  | Statistics for SBR comparison between mEosEM and mEosEM-E in OFF images                                                    |
| <b>Table S7</b>  | Statistics for SBR comparison between mEosEM and mEosEM-E in ON images                                                     |
| <b>Table S8</b>  | Statistics for fluorescence intensity comparison of RFPs in live cells                                                     |
| <b>Table S9</b>  | Statistics for fluorescence intensity comparison of RFPs after pre-fixation                                                |
| <b>Table S10</b> | Statistics for fluorescence intensity comparison of RFPs after 1% OsO <sub>4</sub> post-fixation                           |
| <b>Table S11</b> | Statistics for fluorescence intensity comparison of RFPs after 1% OsO <sub>4</sub> post-fixation and dehydration treatment |
| <b>Table S12</b> | Statistics for fluorescence intensity comparison of RFPs after dehydration treatment                                       |

|                  |                                                                                      |
|------------------|--------------------------------------------------------------------------------------|
| <b>Table S13</b> | Statistics for thermostability comparison of RFPs                                    |
| <b>Table S14</b> | Statistics for fluorescence intensity comparison of RFPs after EM sample preparation |
| <b>Table S15</b> | Statistics for SBR comparison of RFPs after EM sample preparation                    |
| <b>Table S16</b> | Statistics for photostability comparison of RFPs                                     |

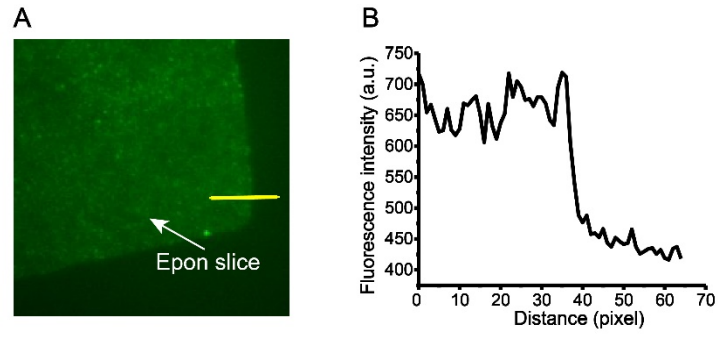

**Figure S1.** Autofluorescence of an Epon resin slice. **(A)** A corner of an Epon slice was imaged under 488-nm laser ( $0.41 \text{ kW/cm}^2$ ). **(B)** Fluorescence intensity profile of the yellow line in **(A)**. Fluorescence intensity was plotted against distance.

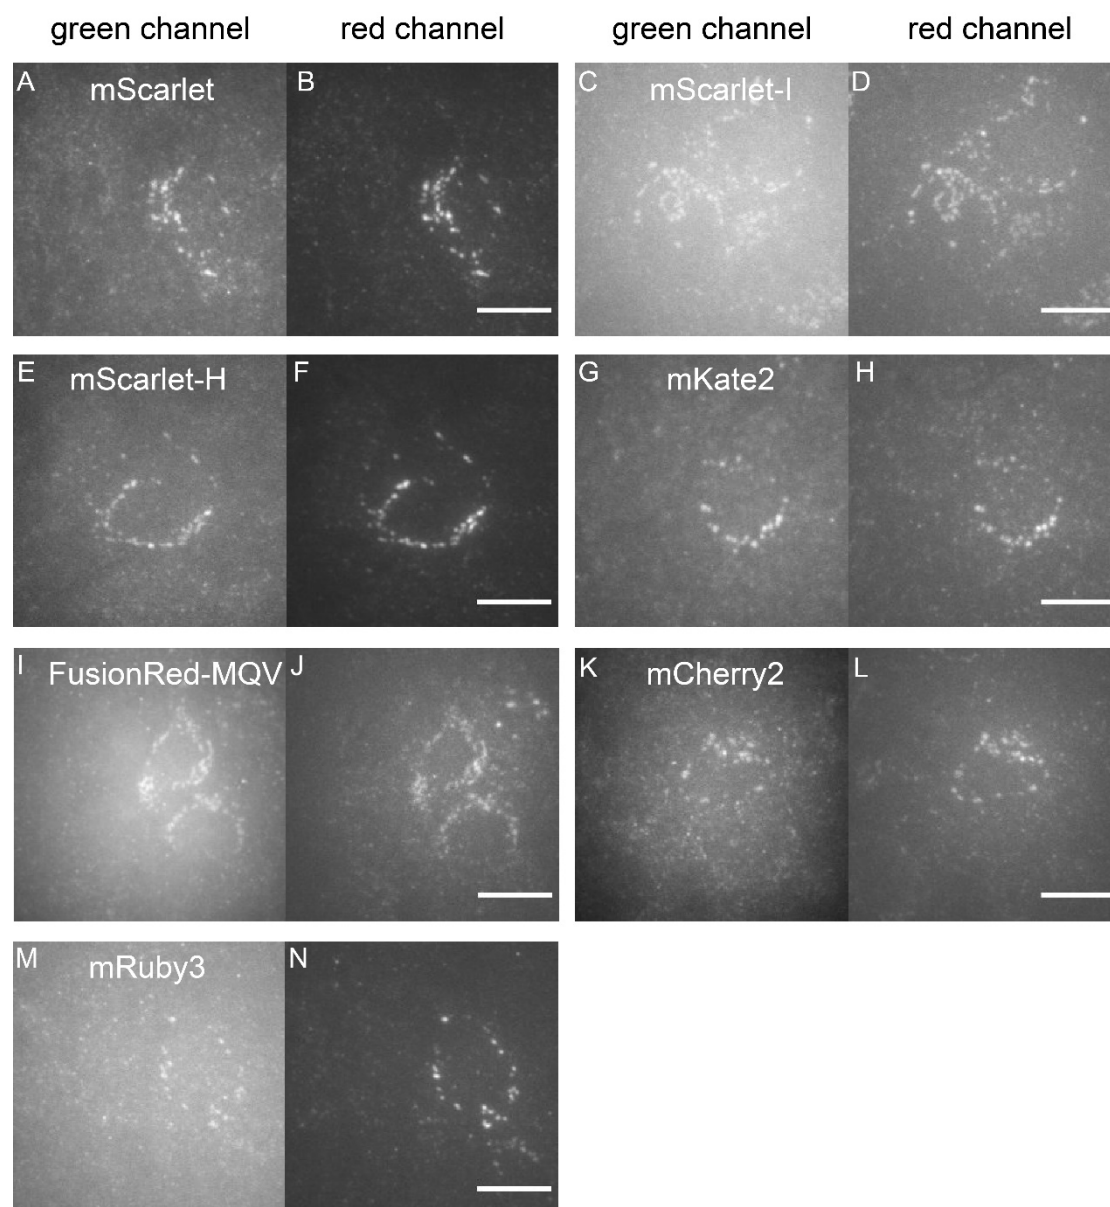

**Figure S2.** Green fluorescence emission properties of RFPs. HEK 293T cells expressing RFPs were prepared under standard EM sample preparation and sectioned into 100 nm slices. Sample slices were imaged by wide field fluorescence microscopy with sequential illumination of 561- and 488-nm laser. (A), (C), (E), (G), (I), (K) and (M) Slices were illuminated under 488-nm laser ( $0.92 \text{ kW/cm}^2$ ) and signals were recorded from the green channel. (B), (D), (F), (H), (J), (L) and (N) Slices were illuminated under 561-nm laser ( $0.57 \text{ kW/cm}^2$ ) and signals were recorded from the red channel. Scale bars,  $10 \mu\text{m}$ .

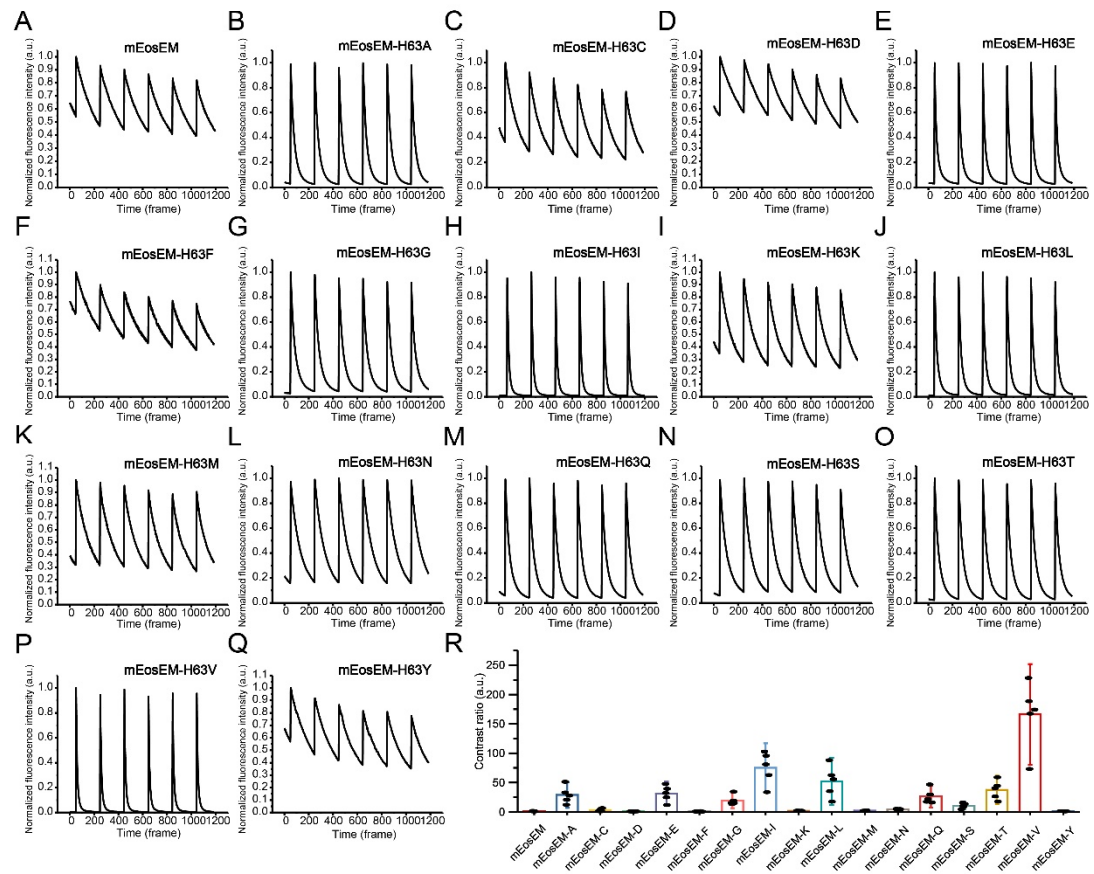

**Figure S3.** Photoswitching properties of mEosEM and mutants before EM sample preparation. (A-Q) Normalized fluorescence intensities of mEosEM and mutants were plotted against time. Cells expressing different fluorescent proteins were continuously illuminated with a 488-nm laser ( $8 \text{ W/cm}^2$ ), while every 10 s, a 405-nm laser pulse (0.1 s,  $9 \text{ W/cm}^2$ ) were applied to switch on the FPs. Exposure time, 50 ms. (R) Mean contrast ratios of mEosEM and mutants before EM sample preparation. Error bars represent standard errors.  $n = 5$ . Data are summarized in Table S1.

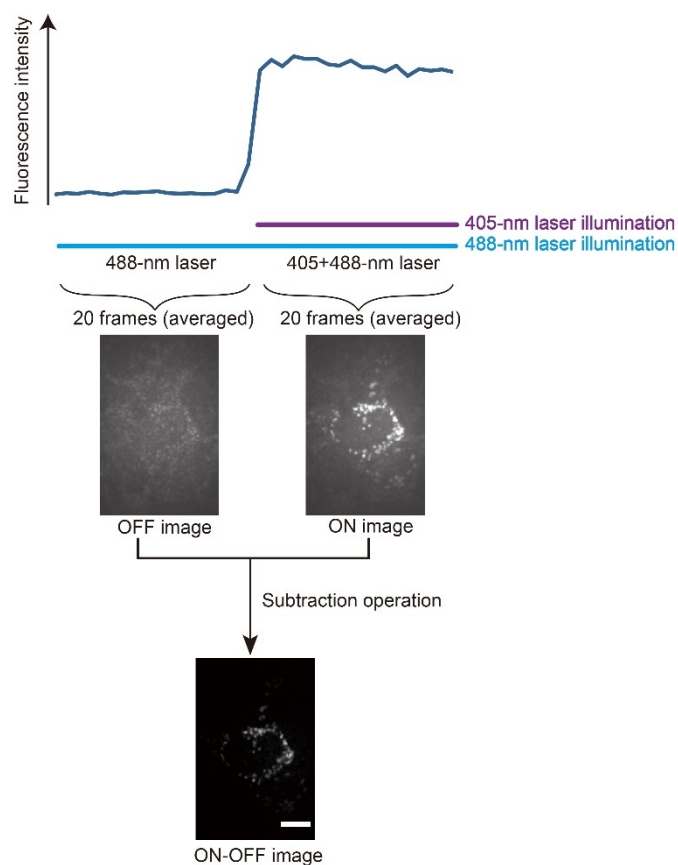

**Figure S4.** Scheme of sLM imaging of an EM sample. 100-nm cell sections were imaged under a continuous 488-nm laser for 50 frames, after which the 405-nm laser was added for 20 frames to record the fluorescence signal of the FPs during the on-state. The 20 frames immediately before 405-nm illumination were averaged to produce OFF images, and the subsequent 20 frames with 405-nm illumination were averaged to produce ON images. The sLM images (ON — OFF images) were generated by pixel-by-pixel subtraction using adjacent ON and OFF images. Scale bar, 5 $\mu$ m.

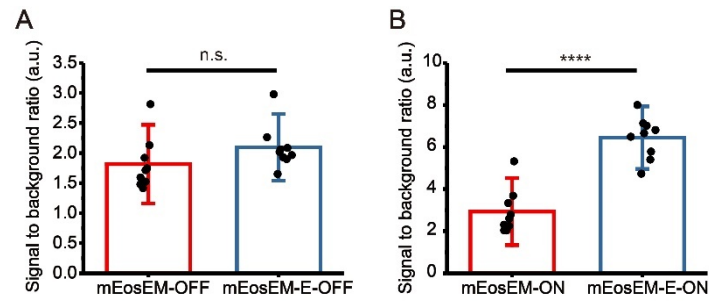

**Figure S5.** SBR comparison of mEosEM and mEosEM-E in OFF- and ON-images. **(A)** Statistics of SBR in OFF-images between mEosEM and mEosEM-E. **(B)** Statistics of SBR in ON-images between mEosEM and mEosEM-E. Bars represent mean  $\pm$  SD. P-value were determined with two-tailed t-test in **(A-B)** (n = 9). n.s. indicates  $p > 0.05$ , \*\*\*\* indicates  $p < 0.0001$ . Data are summarized in Table S6 & S7.

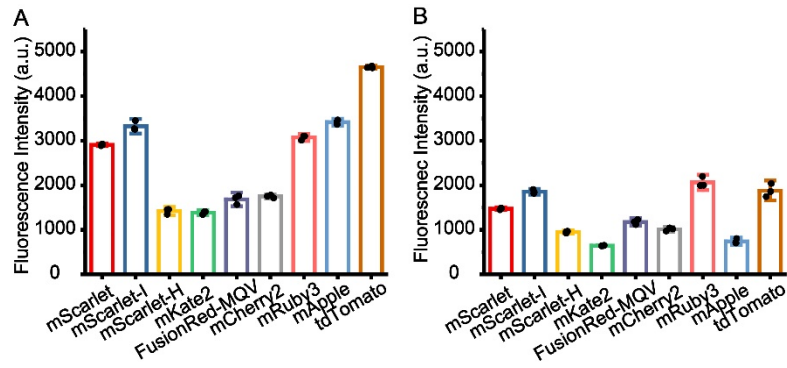

**Figure S6.** Pre-fixation influence on RFPs. **(A)** Fluorescence intensity of RFPs in live cells. Cells expressing RFPs were seeded in 96-well plates and imaged. **(B)** Fluorescence intensity of RFPs in pre-fixed cells. Cells expressing RFPs were seeded in 96-well plates and treated with fixation buffer (2.5% Glutaraldehyde and 2% Paraformaldehyde in PBS) for 15 min then washed 3 times with PBS buffer. Data were recorded using a high-content screening system. Excitation wavelength, 561 nm. Exposure time, 40 ms. Bars represent mean  $\pm$  SD ( $n = 3$ ). Data are summarized in Table S8 & S9.



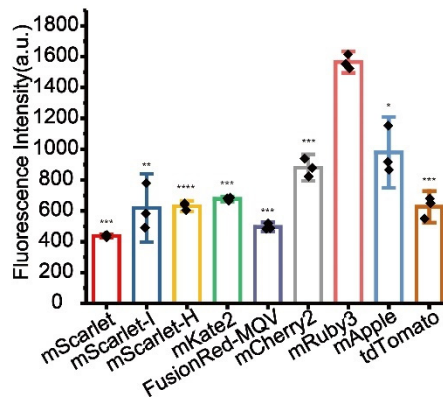

**Figure S7.** Fluorescence intensity of RFPs in pre-fixed cells followed by dehydration. Cells expressing RFPs were seeded in 96-well plates and fixed with fixation buffer (2.5% Glutaraldehyde and 2% Paraformaldehyde in PBS buffer) for 15 min, and then treated with absolute ethanol for 20 min. Data were recorded using a high-content screening system. Excitation wavelength, 561 nm. Exposure time, 40 ms. Bars represent mean  $\pm$  SD. P-value were determined with two-tailed t-tests ( $n = 3$ ). \* indicates  $p < 0.05$ . \*\* indicates  $p < 0.01$ . \*\*\* indicates  $p < 0.001$ . \*\*\*\* indicates  $p < 0.0001$ . Data are summarized in Table S12.

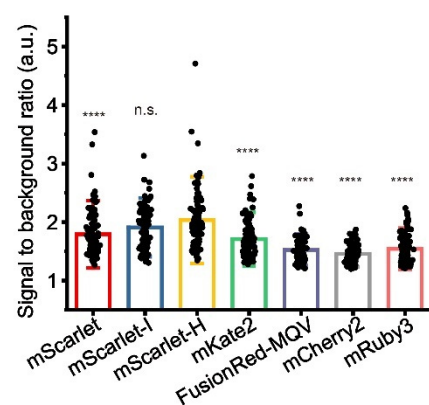

**Figure S8.** SBR comparison of RFPs after EM sample preparation. HEK 293T cells expressing RFPs were prepared under standard EM sample preparation and sectioned into 100 nm slices. Mann-Whitney U test was performed ( $n = 106$ ). n.s. indicates  $p > 0.05$ , \*\*\*\* indicates  $p < 0.0001$ . Data are summarized in Table S15.

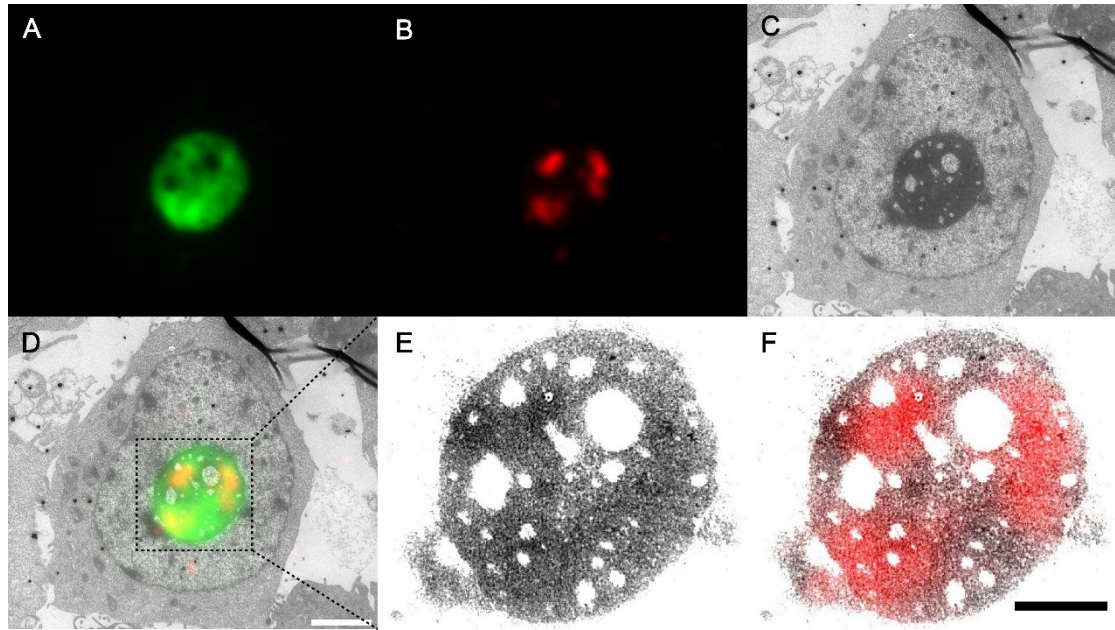

**Figure S9.** Dual-color post-Epon-embedding CLEM imaging of Nopp52 and Nopp140. **(A-D)** Dual-color CLEM imaging of mEosEM-E labeled Nopp52 and mScarlet-H labeled Nopp140 protein in HEK 293T cell sections (100 nm). Green channel FM **(A)**, red channel FM **(B)**, EM **(C)**, and CLEM **(D)** images. Scale bar, 2  $\mu\text{m}$ . **(E-F)** Enlarged EM **(E)** and red channel CLEM **(F)** images of boxed area in **(D)**. Gamma value: 1.6 for both channels. Scale bar, 1  $\mu\text{m}$ .

|          | Contrast ratio |        |         |         |         | mean    | s.d.   |
|----------|----------------|--------|---------|---------|---------|---------|--------|
| mEosEM   | 0.623          | 1.114  | 0.845   | 0.821   | 1.673   | 1.015   | 0.407  |
| mEosEM-A | 20.716         | 32.975 | 12.130  | 51.253  | 27.805  | 28.976  | 14.711 |
| mEosEM-C | 0.840          | 1.117  | 4.340   | 6.428   | 1.744   | 2.894   | 2.412  |
| mEosEM-D | 0.758          | 0.814  | 0.408   | 0.751   | 0.577   | 0.662   | 0.167  |
| mEosEM-E | 39.382         | 32.132 | 47.701  | 24.849  | 11.781  | 31.169  | 13.762 |
| mEosEM-F | 1.428          | 0.626  | 0.691   | 0.505   | 0.488   | 0.747   | 0.389  |
| mEosEM-G | 15.291         | 19.369 | 14.976  | 34.559  | 13.255  | 19.490  | 8.718  |
| mEosEM-I | 102.815        | 62.832 | 81.008  | 33.619  | 95.741  | 75.203  | 27.840 |
| mEosEM-K | 2.102          | 1.887  | 1.420   | 1.964   | 1.854   | 1.845   | 0.256  |
| mEosEM-L | 62.654         | 17.426 | 88.161  | 55.673  | 35.340  | 51.851  | 26.960 |
| mEosEM-M | 1.926          | 1.776  | 2.145   | 2.118   | 2.663   | 2.126   | 0.336  |
| mEosEM-N | 3.957          | 4.793  | 4.574   | 2.872   | 5.173   | 4.274   | 0.899  |
| mEosEM-Q | 22.014         | 29.660 | 16.040  | 46.654  | 17.260  | 26.326  | 12.559 |
| mEosEM-S | 4.546          | 8.633  | 13.426  | 10.471  | 15.886  | 10.592  | 4.372  |
| mEosEM-T | 40.195         | 44.538 | 58.869  | 17.686  | 26.349  | 37.527  | 16.050 |
| mEosEM-V | 228.326        | 73.234 | 174.318 | 188.631 | 167.465 | 166.395 | 57.168 |
| mEosEM-Y | 0.757          | 1.103  | 1.248   | 1.331   | 1.028   | 1.093   | 0.223  |

**Table S1.** Statistics for contrast ratio of mEosEM and mutants before EM sample preparation. n = 5.

|                | mEosEM                | mEosEM-E |
|----------------|-----------------------|----------|
| Contrast Ratio | 2.147                 | 4.660    |
|                | 2.513                 | 7.366    |
|                | 2.216                 | 7.561    |
|                | 2.256                 | 7.351    |
|                | 2.132                 | 4.959    |
|                | 2.233                 | 4.190    |
|                | 2.404                 | 4.832    |
|                | 2.289                 | 6.791    |
|                | 1.597                 | 6.082    |
| mean           | 2.199                 | 5.977    |
| s.d.           | 0.256                 | 1.336    |
| <i>p</i> value | 2.13×10 <sup>-5</sup> |          |

**Table S2.** Statistics for contrast ratio comparison between mEosEM and mEosEM-E. Two-tailed t-test was performed between mEosEM and mEosEM-E, n = 9.

|                            | mEosEM (OFF) | mEosEM (ON) | mEosEM (ON-OFF) |
|----------------------------|--------------|-------------|-----------------|
| Signal-to-Background Ratio | 2.130        | 3.684       | 12.289          |
|                            | 2.812        | 5.321       | 12.680          |
|                            | 1.921        | 3.336       | 11.894          |
|                            | 1.716        | 2.604       | 6.375           |
|                            | 1.416        | 2.035       | 5.226           |
|                            | 1.746        | 2.792       | 9.019           |
|                            | 1.478        | 2.304       | 9.097           |
|                            | 1.524        | 2.251       | 6.370           |
|                            | 1.593        | 2.039       | 3.676           |
| mean                       | 1.815        | 2.930       | 8.514           |
| s.d.                       | 0.437        | 1.062       | 3.298           |
| <i>p</i> value             |              |             | 0.000762        |

**Table S3.** Statistics for SBR of mEosEM in OFF, ON, and ON — OFF images. Two-tailed t-test was performed between mEosEM (ON) and mEosEM (ON — OFF), n = 9.

|                            | mEosEM-E<br>(OFF) | mEosEM-E (ON) | mEosEM-E<br>(ON-OFF)  |
|----------------------------|-------------------|---------------|-----------------------|
| Signal-to-Background Ratio | 2.086             | 5.785         | 28.925                |
|                            | 1.651             | 4.731         | 16.408                |
|                            | 1.931             | 7.015         | 34.881                |
|                            | 2.020             | 7.132         | 27.124                |
|                            | 1.899             | 5.406         | 38.488                |
|                            | 2.978             | 8.000         | 22.849                |
|                            | 2.263             | 6.488         | 28.004                |
|                            | 1.966             | 6.808         | 37.050                |
|                            | 2.061             | 6.655         | 31.652                |
| mean                       | 2.095             | 6.447         | 29.487                |
| s.d.                       | 0.370             | 0.990         | 7.029                 |
| $p$ value                  |                   |               | $7.87 \times 10^{-6}$ |

**Table S4.** Statistics for SBR of mEosEM-E in OFF, ON, and ON — OFF images. Two-tailed t-test was performed between mEosEM-E (ON) and mEosEM-E (ON — OFF),  $n = 9$ .

|                            | mEosEM                | mEosEM-E |
|----------------------------|-----------------------|----------|
| Signal-to-Background Ratio | 12.289                | 28.925   |
|                            | 12.680                | 16.408   |
|                            | 11.894                | 34.881   |
|                            | 6.375                 | 27.124   |
|                            | 5.226                 | 38.488   |
|                            | 9.019                 | 22.849   |
|                            | 9.097                 | 28.004   |
|                            | 6.370                 | 37.050   |
|                            | 3.676                 | 31.652   |
| mean                       | 8.514                 | 29.487   |
| s.d.                       | 3.298                 | 7.029    |
| <i>p</i> value             | $4.70 \times 10^{-5}$ |          |

**Table S5.** Statistics for SBR comparison between mEosEM and mEosEM-E in ON — OFF images. Two-tailed t-test was performed between mEosEM and mEosEM-E,  $n = 9$ .



|                | mEosEM-OFF | mEosEM-E-OFF |
|----------------|------------|--------------|
| Contrast Ratio | 2.130      | 2.086        |
|                | 2.812      | 1.651        |
|                | 1.921      | 1.931        |
|                | 1.716      | 2.020        |
|                | 1.416      | 1.899        |
|                | 1.746      | 2.978        |
|                | 1.478      | 2.263        |
|                | 1.524      | 1.966        |
|                | 1.593      | 2.061        |
| mean           | 1.815      | 2.095        |
| s.d.           | 0.436      | 0.370        |
| <i>p</i> value | 0.162      |              |

**Table S6.** Statistics for SBR comparison between mEosEM and mEosEM-E in OFF images. Two-tailed t-test was performed between mEosEM and mEosEM-E,  $n = 9$ .

|                | mEosEM-ON             | mEosEM-E-ON |
|----------------|-----------------------|-------------|
| Contrast Ratio | 3.684                 | 5.785       |
|                | 5.321                 | 4.731       |
|                | 3.336                 | 7.015       |
|                | 2.604                 | 7.132       |
|                | 2.035                 | 5.406       |
|                | 2.792                 | 8.000       |
|                | 2.304                 | 6.488       |
|                | 2.251                 | 6.808       |
|                | 2.039                 | 6.655       |
| mean           | 2.930                 | 6.447       |
| s.d.           | 1.062                 | 0.990       |
| <i>p</i> value | $1.94 \times 10^{-6}$ |             |

**Table S7.** Statistics for SBR comparison between mEosEM and mEosEM-E in ON images. Two-tailed t-test was performed between mEosEM and mEosEM-E,  $n = 9$ .

|              | mScarlet | mScarlet-l | mScarlet-H | mKate2   | FusionRed-MQV | mCherry2 | mRuby3   | mApple   | tdTomato |
|--------------|----------|------------|------------|----------|---------------|----------|----------|----------|----------|
| Fluorescence |          |            |            |          |               |          |          |          |          |
| Intensity    | 2928     | 3256       | 1453       | 1406     | 1568          | 1752     | 3011     | 3364     | 4674     |
|              | 2906     | 3269       | 1457       | 1344     | 1763          | 1715     | 3100     | 3423     | 4637     |
|              | 2887     | 3449       | 1348       | 1401     | 1719          | 1781     | 3104     | 3465     | 4643     |
| Mean         | 2907     | 3324.667   | 1419.333   | 1383.667 | 1683.333      | 1749.333 | 3071.667 | 3417.333 | 4651.333 |
| s.d.         | 20.51828 | 107.8718   | 61.80885   | 34.44319 | 102.2758      | 33.08071 | 52.57693 | 50.73789 | 19.85783 |

**Table S8.** Statistics for fluorescence intensity comparison of RFPs in live cells. n = 3.

|              | mScarlet | mScarlet-l | mScarlet-H | mKate2   | FusionRed-MQV | mCherry2 | mRuby3   | mApple   | tdTomato |
|--------------|----------|------------|------------|----------|---------------|----------|----------|----------|----------|
| Fluorescence |          |            |            |          |               |          |          |          |          |
| Intensity    | 1490     | 1819       | 955.6      | 651.3    | 1117          | 974.2    | 1995     | 703.9    | 1860     |
|              | 1483     | 1903       | 966.4      | 639.8    | 1228          | 1019     | 2198     | 715.2    | 2041     |
|              | 1450     | 1841       | 924.8      | 642.8    | 1178          | 1041     | 2000     | 803.6    | 1745     |
| Mean         | 1474.333 | 1854.333   | 948.9333   | 644.6333 | 1174.333      | 1011.4   | 2064.333 | 740.9    | 1882     |
| s.d.         | 21.36196 | 43.55839   | 21.58642   | 5.965177 | 55.59077      | 34.04233 | 115.7857 | 54.59295 | 149.2213 |

**Table S9.** Statistics for fluorescence intensity comparison of RFPs after pre-fixation. n = 3.

|                | mScarlet | mScarlet-I | mScarlet-H | mKate2  | FusionRed-MQV | mCherry2 | mRuby3   | mApple  | tdTomato |
|----------------|----------|------------|------------|---------|---------------|----------|----------|---------|----------|
| Fluorescence   |          |            |            |         |               |          |          |         |          |
| Intensity      | 741.800  | 791.900    | 609.200    | 322.500 | 445.800       | 552.600  | 743.900  | 311.400 | 482.700  |
|                | 712.100  | 764.000    | 592.400    | 320.800 | 440.100       | 505.400  | 738.000  | 304.400 | 495.900  |
|                | 724.400  | 833.300    | 625.800    | 330.300 | 438.100       | 519.300  | 776.600  | 310.600 | 477.000  |
| Mean           | 726.100  | 796.400    | 609.133    | 324.533 | 441.333       | 525.767  | 752.833  | 308.800 | 485.200  |
| s.d.           | 14.923   | 34.868     | 16.700     | 5.066   | 3.995         | 24.255   | 20.793   | 3.831   | 9.695    |
| <i>p</i> value |          |            |            |         |               |          |          |         |          |
| (compared to   |          |            |            |         |               |          |          |         |          |
| mKate2)        | 0.000127 | 0.00150    | 0.000478   |         |               |          | 0.000423 |         |          |
| <i>p</i> value |          |            |            |         |               |          |          |         |          |
| (compared to   |          |            |            |         |               |          |          |         |          |
| mCherry2)      | 0.000714 | 0.000695   | 0.0108     |         |               |          | 0.000286 |         |          |

**Table S10.** Statistics for fluorescence intensity comparison of RFPs after 1% OsO<sub>4</sub> post-fixation. Two-tailed t-tests were performed between mKate2 and mScarlet, mScarlet-I, mScarlet-H, mRuby3, respectively, n = 3. Two-tailed t-tests were performed between mCherry2 and mScarlet, mScarlet-I, mScarlet-H, mRuby3, respectively, n = 3.

|                | mScarlet | mScarlet-I | mScarlet-H | mKate2  | FusionRed-MQV | mCherry2 | mRuby3  | mApple  | tdTomato |
|----------------|----------|------------|------------|---------|---------------|----------|---------|---------|----------|
| Fluorescence   |          |            |            |         |               |          |         |         |          |
| Intensity      | 321.400  | 277.300    | 314.200    | 298.100 | 314.400       | 332.200  | 395.900 | 317.100 | 325.000  |
|                | 296.800  | 281.100    | 319.100    | 297.800 | 272.400       | 308.000  | 385.100 | 312.300 | 325.200  |
|                | 333.600  | 285.700    | 309.500    | 305.300 | 283.900       | 297.300  | 407.500 | 309.300 | 295.700  |
| Mean           | 317.267  | 281.367    | 314.267    | 300.400 | 290.233       | 312.500  | 396.167 | 312.900 | 315.300  |
| s.d.           | 18.745   | 4.206      | 4.800      | 4.246   | 21.704        | 17.880   | 11.202  | 3.934   | 16.974   |
| <i>p</i> value | 0.00637  | 0.00114    | 0.00216    | 0.00177 | 0.00492       | 0.00435  |         | 0.00282 | 0.00388  |

**Table S11.** Statistics for fluorescence intensity comparison of RFPs after 1% OsO<sub>4</sub> post-fixation and dehydration treatment. Two-tailed t-tests were performed between mRuby3 and other RFPs, n = 3.

|                | mScarlet | mScarlet-l | mScarlet-H            | mKate2   | FusionRed-MQV | mCherry2 | mRuby3   | mApple   | tdTomato |
|----------------|----------|------------|-----------------------|----------|---------------|----------|----------|----------|----------|
| Fluorescence   |          |            |                       |          |               |          |          |          |          |
| Intensity      | 429.100  | 583.500    | 648.900               | 685.600  | 518.800       | 938.800  | 1553.000 | 1153.000 | 680.100  |
|                | 442.600  | 491.500    | 604.900               | 681.800  | 487.400       | 878.500  | 1615.000 | 917.600  | 650.000  |
|                | 440.500  | 780.200    | 639.500               | 665.700  | 483.300       | 823.900  | 1525.000 | 865.900  | 549.900  |
| Mean           | 437.400  | 618.400    | 631.100               | 677.700  | 496.500       | 880.400  | 1564.333 | 978.833  | 626.667  |
| s.d.           | 7.264    | 147.480    | 23.172                | 10.565   | 19.421        | 57.474   | 46.058   | 153.032  | 68.164   |
| <i>p</i> value | 0.000420 | 0.00461    | 8.06×10 <sup>-5</sup> | 0.000526 | 0.000102      | 0.000119 |          | 0.0157   | 0.000101 |

**Table S12.** Statistics for fluorescence intensity comparison of RFPs after dehydration treatment. Two-tailed t-tests were performed between mRuby3 and other RFPs, n = 3.

|                 | mScarlet | mScarlet-I | mScarlet-H | mKate2                | FusionRed-MQV | mCherry2              | mRuby3   | mApple                | tdTomato |
|-----------------|----------|------------|------------|-----------------------|---------------|-----------------------|----------|-----------------------|----------|
| Thermostability |          |            |            |                       |               |                       |          |                       |          |
| Ratio           | 0.840    | 0.682      | 0.994      | 0.071                 | 0.022         | 0.214                 | 0.852    | 0.550                 | 0.794    |
|                 | 0.842    | 0.742      | 0.959      | 0.071                 | 0.021         | 0.206                 | 0.856    | 0.575                 | 0.728    |
|                 | 0.856    | 0.750      | 0.975      | 0.066                 | 0.021         | 0.205                 | 0.822    | 0.603                 | 0.761    |
| Mean            | 0.846    | 0.725      | 0.976      | 0.069                 | 0.021         | 0.208                 | 0.843    | 0.576                 | 0.761    |
| s.d.            | 0.009    | 0.037      | 0.017      | 0.003                 | 0.001         | 0.005                 | 0.018    | 0.026                 | 0.033    |
| <i>p</i> value  | 0.00151  | 0.00223    |            | $8.67 \times 10^{-5}$ | 0.000109      | $5.71 \times 10^{-5}$ | 0.000840 | $7.76 \times 10^{-5}$ | 0.00199  |

**Table S13.** Statistics for thermostability comparison of RFPs. Two-tailed t-tests were performed between mScarlet-H and other RFPs, n = 3.



|                | mScarlet | mScarlet-I | mScarlet-H | mKate2                | FusionRed-MQV          | mCherry2               | mRuby3                 |
|----------------|----------|------------|------------|-----------------------|------------------------|------------------------|------------------------|
| Mean           | 238.979  | 283.083    | 327.015    | 210.963               | 153.836                | 136.175                | 158.454                |
| s.d.           | 135.404  | 123.250    | 178.850    | 107.039               | 58.967                 | 48.306                 | 77.657                 |
| <i>p</i> value | 0.000005 | 0.144      |            | $1.78 \times 10^{-9}$ | $3.23 \times 10^{-21}$ | $1.89 \times 10^{-25}$ | $1.19 \times 10^{-18}$ |

**Table S14.** Statistics for fluorescence intensity comparison of RFPs after EM sample preparation.

Mann-Whitney U tests were performed between mScarlet-H and each RFP, n = 106.

|                | mScarlet | mScarlet-I | mScarlet-H | mKate2                | FusionRed-MQV          | mCherry2               | mRuby3                 |
|----------------|----------|------------|------------|-----------------------|------------------------|------------------------|------------------------|
| Mean           | 1.791    | 1.910      | 2.034      | 1.706                 | 1.524                  | 1.456                  | 1.541                  |
| s.d.           | 0.385    | 0.335      | 0.495      | 0.307                 | 0.181                  | 0.147                  | 0.237                  |
| <i>p</i> value | 0.000009 | 0.182      |            | $6.14 \times 10^{-9}$ | $8.95 \times 10^{-22}$ | $6.34 \times 10^{-27}$ | $1.64 \times 10^{-18}$ |

**Table S15.** Statistics for SBR comparison of RFPs after EM sample preparation. Mann-Whitney U tests were performed between mScarlet-H and each RFP, n = 106.

|                | mScarlet | mScarlet-l | mScarlet-H | mKate2  | FusionRed-MQV         | mCherry2 | mRuby3  |
|----------------|----------|------------|------------|---------|-----------------------|----------|---------|
| t1/e           | 341.040  | 359.090    | 476.280    | 366.780 | 269.560               | 307.030  | 636.990 |
|                | 377.370  | 389.060    | 389.790    | 424.040 | 345.240               | 307.270  | 471.980 |
|                | 351.770  | 353.860    | 452.630    | 426.160 | 273.080               | 327.990  | 527.020 |
|                | 300.120  | 310.990    | 436.420    | 371.070 | 275.120               | 389.660  | 521.720 |
|                | 380.550  | 433.362    | 440.220    | 290.670 | 253.760               | 381.610  | 482.540 |
| Mean           | 344.147  | 366.071    | 443.090    | 362.633 | 267.320               | 366.420  | 510.427 |
| s.d.           | 32.610   | 45.379     | 31.644     | 55.259  | 35.600                | 40.197   | 65.429  |
| <i>p</i> value | 0.0470   | 0.162      |            | 0.176   | 6.37×10 <sup>-5</sup> | 0.0508   | 0.0299  |

**Table S16.** Statistics for photostability comparison of RFPs. Two-tailed t-tests were performed between mScarlet-H and other RFPs, n = 3.
